# Supplementary material
Source: ML conference proceedings conference paper supplement (https://openreview.net/forum?id=eE-S1U5GG94)
Supplement: supplementary_material [file attachment]

---

# Supplementary materials for "Principal Components Analysis based frameworks for efficient missing data imputation algorithms"

---

Anonymous Author(s)

Affiliation

Address

email

1 In the following, we present the supplementary materials for the paper *Principal Components Analysis*  
 2 *based frameworks for efficient missing data imputation algorithms*.

### 3 A PIC on the Fashion MNIST dataset

Table 1: 5 - fold cross validation results (accuracy, speed) of SVM for different imputation-classification strategies on the Fashion MNIST dataset with  $q = 700$ , when the missing values in  $\mathcal{M}$  are simulated at random given rates.

| Imputer    | Strategy   | missing rate      |                   |                   |
|------------|------------|-------------------|-------------------|-------------------|
|            |            | 20%               | 40%               | 60%               |
| softImpute | PIC-reduce | (0.891, 285.707)  | (0.890, 279.263)  | (0.889, 353.506)  |
|            | PIC        | (0.891, 593.652)  | (0.891, 598.726)  | (0.890, 609.252)  |
|            | DI-reduce  | (0.892, 467.406)  | (0.891, 458.625)  | (0.891, 486.162)  |
|            | DI         | (0.892, 710.019)  | (0.892, 644.585)  | (0.891, 630.044)  |
| MICE       | PIC-reduce | (0.892, 2379.869) | (0.892, 1884.385) | (0.891, 2851.581) |
|            | PIC        | (0.892, 2416.485) | (0.891, 1907.529) | (0.892, 2897.839) |
|            | DI-reduce  | NA                | NA                | NA                |
|            | DI         | NA                | NA                | NA                |
| GAIN       | PIC-reduce | (0.892, 539.720)  | (0.891, 580.754)  | (0.891, 660.633)  |
|            | PIC        | (0.891, 583.016)  | (0.892, 608.384)  | (0.891, 703.145)  |
|            | DI-reduce  | (0.891, 1320.018) | (0.891, 1351.854) | (0.890, 1573.656) |
|            | DI         | (0.891, 846.002)  | (0.892, 787.246)  | (0.891, 863.685)  |
| missForest | PIC-reduce | NA                | NA                | NA                |
|            | PIC        | NA                | NA                | NA                |
|            | DI-reduce  | NA                | NA                | NA                |
| KNNI       | PIC-reduce | (0.891, 3040.393) | (0.891, 4235.292) | (0.89, 6059.608)  |
|            | PIC        | (0.891, 3110.041) | (0.891, 4279.305) | (0.889, 6088.542) |
|            | DI-reduce  | NA                | NA                | NA                |
|            | DI         | NA                | NA                | NA                |

#### 4 B PIC on Fashion MNIST under monotone missing data

5 Table 2 shows the full results for PIC on Fashion MNIST under monotone missing data, which  
6 corresponds to the experiment settings in *Section 7.3: Performance on nonrandomly missing data* in  
7 the paper.

8 Interestingly, in this case, for KNNI, at 20% missing rates, DI-reduce is faster than PIC-reduce, and  
9 DI is faster than DI. However, as the missing rates increase to 40% or 60%, PIC-reduce is significantly  
10 faster than PIC, and PIC is also significantly faster than DI. Also, note that in Table 1, when KNNI is  
11 used, DI and DI-reduce gives NA (due to memory issue). This shows that how the data is missing  
12 affects the performance of KNNI, and that PCAI and PIC have the ability to alleviate the memory  
13 requirements of KNNI.

Table 2: Five fold CV results (accuracy, speed) of SVM on monotone data generated on Fashion MNIST. MICE and MissForest are excluded from the table because all the corresponding results are NA.

| Imputer    | Strategy   | missing rate     |                   |                   |
|------------|------------|------------------|-------------------|-------------------|
|            |            | 20%              | 40%               | 60%               |
| softImpute | PIC-reduce | (0.889, 409.676) | (0.889, 421.671)  | (0.889, 369.49)   |
|            | PIC        | (0.889, 507.626) | (0.89, 543.309)   | (0.889, 480.452)  |
|            | DI-reduce  | (0.89, 439.268)  | (0.89, 528.892)   | (0.889, 395.646)  |
|            | DI         | (0.891, 738.494) | (0.891, 872.616)  | (0.89, 646.781)   |
| GAIN       | PIC-reduce | (0.886, 462.478) | (0.883, 429.173)  | (0.882, 449.786)  |
|            | PIC        | (0.886, 493.399) | (0.882, 484.232)  | (0.881, 496.066)  |
|            | DI-reduce  | (0.891, 543.803) | (0.89, 431.947)   | (0.89, 454.981)   |
|            | DI         | (0.892, 902.049) | (0.891, 754.794)  | (0.891, 780.686)  |
| KNNI       | PIC-reduce | (0.89, 2220.308) | (0.89, 2344.1)    | (0.889, 2800.795) |
|            | PIC        | (0.89, 2278.491) | (0.891, 2381.274) | (0.89, 2838.674)  |
|            | DI-reduce  | (0.89, 1720.832) | (0.89, 2614.603)  | (0.89, 3173.561)  |
|            | DI         | (0.891, 1958.2)  | (0.891, 2854.299) | (0.89, 3416.44)   |

#### 14 C PCAI on Fashion MNIST under monotone missing data

15 Table 3 shows the full results for PCAI on Fashion MNIST under monotone missing data, which  
16 corresponds to the experiment settings in *Section 7.3: Performance on nonrandomly missing data* in  
17 the paper.

Table 3: (MSE, speed) for PCAI and DI on the Fashion MNIST dataset under monotone data. MICE and MissForest are excluded from the table because all the corresponding results are NA.

| Imputer    | Strategy | missing rate      |                   |                   |
|------------|----------|-------------------|-------------------|-------------------|
|            |          | 20%               | 40%               | 60%               |
| softImpute | PCAI     | (0.052, 50.057)   | (0.098, 61.523)   | (0.014, 63.632)   |
|            | DI       | (0.050, 170.488)  | (0.095, 212.620)  | (0.013, 212.620)  |
| GAIN       | PCAI     | (0.34, 67.052)    | (0.793, 68.788)   | (0.96, 67.247)    |
|            | DI       | (0.367, 108.869)  | (0.898, 106.761)  | (1.424, 109.571)  |
| KNNI       | PCAI     | (0.054, 1210.02)  | (0.099, 1929.294) | (0.139, 2349.668) |
|            | DI       | (0.046, 2199.876) | (0.085, 3507.741) | (0.120, 4181.563) |
